# Supplementary material for: Claims-Based vs Agency-Reported Patient Outcomes Among Home Health Agencies, 2013-2019
Source: PubMed Central journal article supplement (PMC11007578; doi:10.1001/jamanetworkopen.2024.5692), 2024-04-10
Supplement: jamanetwopen-e245692-s002.pdf [file jamanetwopen-e245692-s002.pdf]

## Data Sharing Statement

Chen. Claims-Based vs Agency-Reported Patient Outcomes Among Home Health Agencies, 2013-2019. *JAMA Netw Open*. Published April 10, 2024.

doi:10.1001/jamanetworkopen.2024.5692

### Data

**Data available:** No

### Additional Information

**Explanation for why data not available:** Our data will not be shared because it falls under a CMS data use agreement
